# Supplementary material for: Silica-diblock fluoropolymer hybrids synthesized by surface-initiated atom transfer radical polymerization
Source: Royal Society of Chemistry journal article supplement (doi:10.1039/c3ra47393g), 2014-01-01
Supplement: c3ra47393g.pdf [file c3ra47393g.pdf]

## Supporting Information

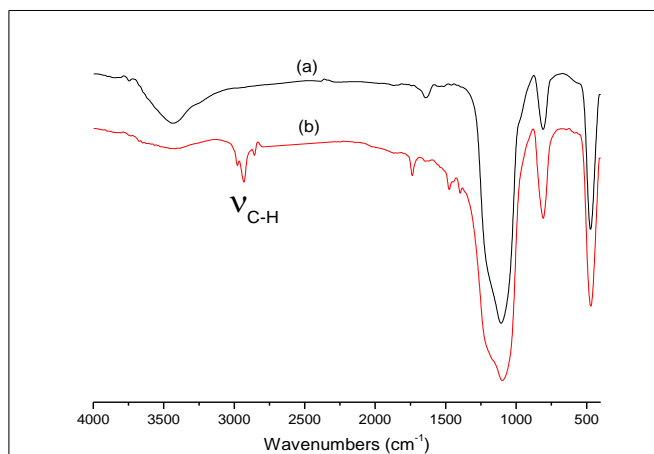

S1. FTIR spectra of SiO<sub>2</sub> particles (a) and SiO<sub>2</sub>-initiator (b)

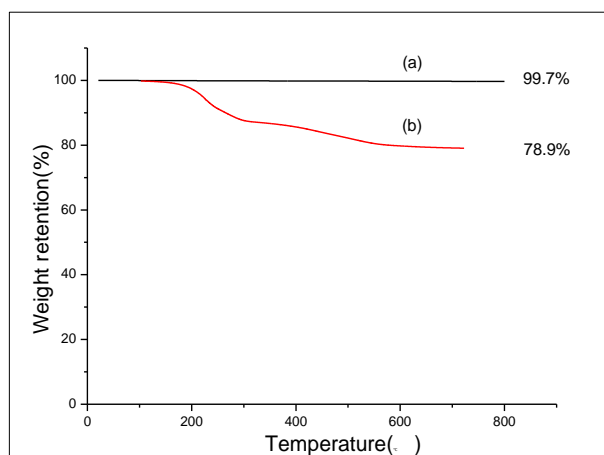

S2. TGA diagram of SiO<sub>2</sub> particles (a) and SiO<sub>2</sub>-initiator (b)
